# Supplementary material for: Metabolic Traits and Stroke Risk in Individuals of African Ancestry: Mendelian Randomization Analysis
Source: PubMed Central journal article supplement (PMC8312569; doi:10.1161/strokeaha.121.034747), 2021-06-03
Supplement: str-52-2680-s006.pdf [file str-52-2680-s006.pdf]

## Change of Authorship Form

(Must be completed and signed by ALL authors)

Please check all that apply

New author(s) have been added (in addition to this form, all new authors must complete the copyright transfer agreement and conflict of interest disclosure.

Change in order of authorship.

An author wishes to remove his/her name. An author's name may only be removed his/her own request and a letter signed by the author should accompany this form

Manuscript Number STROKE/2020/034093 \_\_\_\_\_

Manuscript Title Metabolic traits and stroke risk in individuals of African ancestry: Mendelian randomization analysis

### Former Authorship

Please list ALL AUTHORS in the same order as the original submission. For more than 12, use an extra sheet.

#### Print Name

Name (1) Scott M. Damrauer  
Name (2) Marijana Vujkovic  
Name (3) Keith L. Keene  
Name (4) Myriam Fornage  
Name (5) Marjo-Riitta Järvelin  
Name (6) Stephen Burgess

#### Print Name

Name (7) Dipender Gill  
Name (8) \_\_\_\_\_  
Name (9) \_\_\_\_\_  
Name (10) \_\_\_\_\_  
Name (11) \_\_\_\_\_  
Name (12) \_\_\_\_\_

### New Authorship

All authors must sign below agreeing to the changes in authorship. The authorship order must reflect the authorship order of the manuscript.

|                                       |                              |                         |
|---------------------------------------|------------------------------|-------------------------|
| Name (1) <u>Scott M. Damrauer</u>     | Signature _____              | Date _____              |
| Name (2) <u>Marijana Vujkovic</u>     | Signature _____              | Date _____              |
| Name (3) <u>Keith L. Keene</u>        | Signature _____              | Date _____              |
| Name (4) <u>Myriam Fornage</u>        | Signature _____              | Date _____              |
| Name (5) <u>Marjo-Riitta Järvelin</u> | Signature _____              | Date _____              |
| Name (6) <u>Stephen Burgess</u>       | Signature <u>[Signature]</u> | Date <u>2021-02-10.</u> |
| Name (7) <u>Dipender Gill</u>         | Signature _____              | Date _____              |
| Name (8) _____                        | Signature _____              | Date _____              |
| Name (9) _____                        | Signature _____              | Date _____              |
| Name (10) _____                       | Signature _____              | Date _____              |
| Name (11) _____                       | Signature _____              | Date _____              |
| Name (12) _____                       | Signature _____              | Date _____              |

Please scan and email to [stroke@strokeahajournal.org](mailto:stroke@strokeahajournal.org).
