# Supplementary material for: Metabolic Traits and Stroke Risk in Individuals of African Ancestry: Mendelian Randomization Analysis
Source: PubMed Central journal article supplement (PMC8312569; doi:10.1161/strokeaha.121.034747), 2021-06-03
Supplement: str-52-2680-s007.pdf [file str-52-2680-s007.pdf]

## Change of Authorship Form

(Must be completed and signed by ALL authors)

Please check all that apply

New author(s) have been added (in addition to this form, all new authors must complete the copyright transfer agreement and conflict of interest disclosure.

Change in order of authorship.

An author wishes to remove his/her name. An author's name may only be removed his/her own request and a letter signed by the author should accompany this form

Manuscript Number STROKE/2020/034093 \_\_\_\_\_

Manuscript Title Metabolic traits and stroke risk in individuals of African ancestry: Mendelian randomization analysis \_\_\_\_\_

### Former Authorship

Please list ALL AUTHORS in the same order as the original submission. For more than 12, use an extra sheet.

#### Print Name

Name (1) Segun Fatumo  
Name (2) Ville Karhunen  
Name (3) Tinashe Chikowore  
Name (4) Toure Sounkou  
Name (5) Brenda Udosen  
Name (6) Chisom Ezenwa

#### Print Name

Name (7) Mariam Nakabuye  
Name (8) Opeyemi Soremekun  
Name (9) Iyas Daghlas  
Name (10) David K. Ryan  
Name (11) Amybel Taylor  
Name (12) \_\_\_\_\_

### New Authorship

All authors must sign below agreeing to the changes in authorship. The authorship order must reflect the authorship order of the manuscript.

|                                   |                                |                     |
|-----------------------------------|--------------------------------|---------------------|
| Name (1) <u>Segun Fatumo</u>      | Signature _____                | Date _____          |
| Name (2) <u>Ville Karhunen</u>    | Signature _____                | Date _____          |
| Name (3) <u>Tinashe Chikowore</u> | Signature _____                | Date _____          |
| Name (4) <u>Toure Sounkou</u>     | Signature _____                | Date _____          |
| Name (5) <u>Brenda Udosen</u>     | Signature _____                | Date _____          |
| Name (6) <u>Chisom Ezenwa</u>     | Signature _____                | Date _____          |
| Name (7) <u>Mariam Nakabuye</u>   | Signature _____                | Date _____          |
| Name (8) <u>Opeyemi Soremekun</u> | Signature _____                | Date _____          |
| Name (9) <u>Iyas Daghlas</u>      | Signature _____                | Date _____          |
| Name (10) <u>David K. Ryan</u>    | Signature _____                | Date _____          |
| Name (11) <u>Amybel Taylor</u>    | Signature <u>Amybel Taylor</u> | Date _____          |
| Name (12) <u>Amy M. Mason</u>     | Signature _____                | Date <u>12-2-21</u> |

Please scan and email to [stroke@strokeahajournal.org](mailto:stroke@strokeahajournal.org).
