# Supplementary material for: Metabolic Traits and Stroke Risk in Individuals of African Ancestry: Mendelian Randomization Analysis
Source: PubMed Central journal article supplement (PMC8312569; doi:10.1161/strokeaha.121.034747), 2021-06-03
Supplement: str-52-2680-s012.pdf [file str-52-2680-s012.pdf]

## Change of Authorship Form

(Must be completed and signed by ALL authors)

Please check all that apply

New author(s) have been added (in addition to this form, all new authors must complete the copyright transfer agreement and conflict of interest disclosure.

Change in order of authorship.

An author wishes to remove his/her name. An author's name may only be removed his/her own request and a letter signed by the author should accompany this form

Manuscript Number STROKE/2020/034093 \_\_\_\_\_

Manuscript Title Metabolic traits and stroke risk in individuals of African ancestry: Mendelian randomization analysis

### Former Authorship

Please list ALL AUTHORS in the same order as the original submission. For more than 12, use an extra sheet.

#### Print Name

Name (1) Segun Fatumo  
 Name (2) Ville Karhunen  
 Name (3) Tinashe Chikowore  
 Name (4) Toure Sounkou  
 Name (5) Brenda Udosen  
 Name (6) Chisom Ezenwa

#### Print Name

Name (7) Mariam Nakabuye  
 Name (8) Opeyemi Soremekun  
 Name (9) Iyas Daghlas  
 Name (10) David K. Ryan  
 Name (11) Amybel Taylor  
 Name (12) \_\_\_\_\_

### New Authorship

All authors must sign below agreeing to the changes in authorship. The authorship order must reflect the authorship order of the manuscript.

|                                   |                                                                                                       |                        |
|-----------------------------------|-------------------------------------------------------------------------------------------------------|------------------------|
| Name (1) <u>Segun Fatumo</u>      | Signature <u></u> | Date <u>10/02/2021</u> |
| Name (2) <u>Ville Karhunen</u>    | Signature _____                                                                                       | Date _____             |
| Name (3) <u>Tinashe Chikowore</u> | Signature <u></u>  | Date <u>10/02/2021</u> |
| Name (4) <u>Toure Sounkou</u>     | Signature _____                                                                                       | Date <u>11/02/2021</u> |
| Name (5) <u>Brenda Udosen</u>     | Signature _____                                                                                       | Date <u>11/02/2021</u> |
| Name (6) <u>Chisom Ezenwa</u>     | Signature <u></u> | Date <u>10/02/2021</u> |
| Name (7) <u>Mariam Nakabuye</u>   | Signature _____                                                                                       | Date <u>2/10/2021</u>  |
| Name (8) <u>Opeyemi Soremekun</u> | Signature <u></u> | Date <u>10/02/2021</u> |
| Name (9) <u>Iyas Daghlas</u>      | Signature _____                                                                                       | Date _____             |
| Name (10) <u>David K. Ryan</u>    | Signature _____                                                                                       | Date _____             |
| Name (11) <u>Amybel Taylor</u>    | Signature _____                                                                                       | Date _____             |
| Name (12) <u>Amy M. Mason</u>     | Signature _____                                                                                       | Date _____             |

Please scan and email to [stroke@strokeahajournal.org](mailto:stroke@strokeahajournal.org).
