# Supplementary material for: Metabolic Traits and Stroke Risk in Individuals of African Ancestry: Mendelian Randomization Analysis
Source: PubMed Central journal article supplement (PMC8312569; doi:10.1161/strokeaha.121.034747), 2021-06-03
Supplement: str-52-2680-s016.pdf [file str-52-2680-s016.pdf]

# Change of Authorship Form

---

**(Must be completed and signed by ALL authors)**

Please check all that apply

\_\_\_\_\_ New author(s) have been added (in addition to this form, all new authors must complete the copyright transfer agreement and conflict of interest disclosure.

\_\_\_\_\_ Change in order of authorship.

\_\_\_\_\_ An author wishes to remove his/her name. An author's name may only be removed his/her own request and a letter signed by the author should accompany this form

**Manuscript Number** \_\_\_\_\_

**Manuscript Title** \_\_\_\_\_

## Former Authorship

Please list ALL AUTHORS in the same order as the original submission. For more than 12, use an extra sheet.

### Print Name

Name (1) \_\_\_\_\_  
Name (2) \_\_\_\_\_  
Name (3) \_\_\_\_\_  
Name (4) \_\_\_\_\_  
Name (5) \_\_\_\_\_  
Name (6) \_\_\_\_\_

### Print Name

Name (7) \_\_\_\_\_  
Name (8) \_\_\_\_\_  
Name (9) \_\_\_\_\_  
Name (10) \_\_\_\_\_  
Name (11) \_\_\_\_\_  
Name (12) \_\_\_\_\_

## New Authorship

All authors must sign below agreeing to the changes in authorship. The authorship order must reflect the authorship order of the manuscript.

|                 |                                                                                                |            |
|-----------------|------------------------------------------------------------------------------------------------|------------|
| Name (1) _____  | Signature 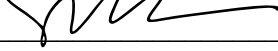 | Date _____ |
| Name (2) _____  | Signature _____                                                                                | Date _____ |
| Name (3) _____  | Signature _____                                                                                | Date _____ |
| Name (4) _____  | Signature _____                                                                                | Date _____ |
| Name (5) _____  | Signature _____                                                                                | Date _____ |
| Name (6) _____  | Signature _____                                                                                | Date _____ |
| Name (7) _____  | Signature _____                                                                                | Date _____ |
| Name (8) _____  | Signature _____                                                                                | Date _____ |
| Name (9) _____  | Signature _____                                                                                | Date _____ |
| Name (10) _____ | Signature _____                                                                                | Date _____ |
| Name (11) _____ | Signature _____                                                                                | Date _____ |
| Name (12) _____ | Signature _____                                                                                | Date _____ |

**Please scan and email to [stroke@strokeahajournal.org](mailto:stroke@strokeahajournal.org).**
